# Supplementary material for: Precipitation isoscape of high reliefs: interpolation scheme designed and tested for monthly resolved precipitation oxygen isotope records of an Alpine domain
Source: Copernicus journal article supplement (doi:10.5194/acp-14-1897-2014), 2014-02-18
Supplement: Supplementary file 1 [file acp-14-1897-2014-supplement.zip]

# Precipitation isoscape of high reliefs: interpolation scheme designed and tested for monthly resolved precipitation oxygen isotope records of an Alpine domain

Zoltán Kern<sup>1,2,3\*</sup>, Balázs Kohán<sup>4</sup>, Markus Leuenberger<sup>1,2</sup>

<sup>1</sup> Division of Climate and Environmental Physics, Physics Institute, University of Bern, Sidlerstrasse 5, CH-3012, Bern, Switzerland

<sup>2</sup> Oeschger Centre for Climate Change Research, Zähringerstrasse 25, CH-3012, Bern, Switzerland

<sup>3</sup> Institute for Geology and Geochemistry, Research Centre for Astronomy and Earth Sciences, MTA, Budaörsi út. 45, H-1112, Budapest, Hungary

<sup>4</sup> Dept. of Environmental and Landscape Geography, Eötvös University, Pázmány Péter sétány, 1/c H-1117, Budapest, Hungary

Table S1. Basic geographical information of the stations.

| Name                  | lon (deg) | lat (deg) | z (m a.s.l.) | First available data | Last available data | completeness % (full <sup>1</sup> /1995-2000) | Reference                                                                        |
|-----------------------|-----------|-----------|--------------|----------------------|---------------------|-----------------------------------------------|----------------------------------------------------------------------------------|
| Basel                 | 7.582     | 47.541    | 319          | Jan 1985             | Dec 2010            | 66.7/100                                      | Network of the Division of Climate and Environmental Physics, University of Bern |
| Burgdorf              | 7.634     | 47.062    | 556          | Jan 1984             | Dec 2010            | 70.2/100                                      |                                                                                  |
| Visp                  | 7.881     | 46.286    | 664          | Feb 1983             | Dec 2010            | 69.3/97.2                                     |                                                                                  |
| St. Gallen            | 9.417     | 47.429    | 805          | Feb 1982             | Dec 2010            | 72.6/98.6                                     |                                                                                  |
| Grindelwald           | 8.042     | 46.624    | 1048         | Jan 1980             | Jan 2005            | 65.4/98.6                                     |                                                                                  |
| St. Niklaus - Grächen | 7.800     | 46.171    | 1450         | Jan 1987             | Dec 2010            | 59.6/98.6                                     |                                                                                  |
| Kl. Scheidegg         | 7.963     | 46.585    | 2065         | Jan 1980             | Dec 2010            | 75.9/94.4                                     |                                                                                  |
| Säntis                | 9.344     | 47.250    | 2470         | Feb 1982             | Dec 2010            | 73.7/97.2                                     |                                                                                  |
| Jungfrauoch           | 7.985     | 46.548    | 3570         | Jan 1983             | Dec 2010            | 71.1/100                                      |                                                                                  |
| Suhr                  | 8.079     | 47.367    | 397          | Jul 1994             | Nov 2010            | 42.8/98.6                                     | Swiss National Network for                                                       |
| Nyon Changins         | 6.230     | 46.380    | 436          | Jul 1992             | Dec 2010            | 48.0/97.2                                     |                                                                                  |

|                        |        |        |      |          |          |           |                                                                    |
|------------------------|--------|--------|------|----------|----------|-----------|--------------------------------------------------------------------|
| Vaduz                  | 9.523  | 47.127 | 460  | Jul 1992 | Dec 2010 | 47.4/98.6 | Isotopes in the Water Cycle (Schürch et al. 2003)                  |
| Sion                   | 7.341  | 46.220 | 482  | Jul 1994 | Dec 2010 | 37.7/97.2 |                                                                    |
| LaBrevine              | 6.609  | 46.982 | 1042 | Jan 1994 | Dec 2010 | 44.5/100  |                                                                    |
| Pontresina             | 9.901  | 46.492 | 1742 | Jul 1994 | Dec 2010 | 52.4/98.6 |                                                                    |
| Locarno*               | 8.787  | 46.172 | 379  | Jan 1973 | Dec 2010 | 92.8/90.3 |                                                                    |
| Bern*                  | 7.439  | 46.951 | 567  | Jan 1971 | Dec 2010 | 100/100   |                                                                    |
| Meiringen*             | 8.178  | 46.727 | 632  | Jan 1971 | Dec 2010 | 99.8/98.6 |                                                                    |
| Guttanen*              | 8.292  | 46.656 | 1055 | Jan 1971 | Dec 2010 | 99.6/98.6 |                                                                    |
| Grimsel*               | 8.332  | 46.571 | 1950 | Jan 1971 | Dec 2010 | 100/100   |                                                                    |
| Weil am Rhein          | 7.601  | 47.602 | 249  | Jan 1988 | Dec 2005 | 46.1/94.4 | IAEA-GNIP network (IAEA 2010)                                      |
| Konstanz               | 9.179  | 47.691 | 447  | Jan 1978 | Dec 2005 | 72.8/100  |                                                                    |
| Garmisch-Partenkirchen | 11.070 | 47.480 | 720  | Jan 1978 | Dec 2005 | 73.5/100  |                                                                    |
| Hohenpeissenberg       | 11.009 | 47.801 | 977  | Jan 1974 | Mar 1999 | 62.1/43.1 |                                                                    |
| Feldberg-Schwarzwald   | 8.006  | 47.873 | 1493 | Jan 1918 | Aug 1985 | 11.0/0.0  |                                                                    |
| Thonon les Bains       | 6.473  | 46.373 | 385  | Jun 1963 | Dec 2002 | 77.9/100  |                                                                    |
| Bregenz                | 9.742  | 47.491 | 430  | Jan 1973 | Dec 2010 | 89.0/100  | Austrian Network of Isotopes in Precipitation (Kralik et al. 2003) |
| Innsbruck              | 11.354 | 47.259 | 580  | Jan 1988 | Dec 2010 | 48.2/95.8 |                                                                    |
| Haiming                | 10.883 | 47.247 | 695  | Jan 1973 | Dec 2002 | 61.0/98.6 |                                                                    |
| Schopfernau            | 10.002 | 47.316 | 835  | Jan 1973 | Dec 2010 | 89.3/100  |                                                                    |
| Reutte                 | 10.750 | 47.494 | 870  | Jan 1973 | Dec 2010 | 65.6/83.8 |                                                                    |
| Scharnitz              | 11.250 | 47.383 | 964  | Jan 1973 | Nov 2002 | 78.7/100  |                                                                    |
| Langenfeld             | 10.970 | 47.069 | 1180 | Jan 1973 | Dec 2010 | 89.3/98.6 |                                                                    |
| Obergurgl              | 11.026 | 46.867 | 1940 | Jan 1973 | Dec 2010 | 88.4/97.2 |                                                                    |
| Patscherkofel          | 11.460 | 47.208 | 2245 | Jan 1973 | Dec 2010 | 87.3/100  |                                                                    |
| Bellinzago             | 8.644  | 45.570 | 190  | Jan 1995 | Dec 1996 | 5.0/31.9  | Longinelli and Selmo, 2003                                         |
| Sarnico                | 9.958  | 45.668 | 197  | Jan 1994 | Dec 1996 | 7.7/31.9  |                                                                    |
| Pallanza               | 8.551  | 45.923 | 208  | Jan 1995 | Dec 1996 | 5.3/33.3  |                                                                    |
| Boario-Darfo           | 10.182 | 45.880 | 208  | Feb 1992 | Jan 1997 | 12.5/33.3 |                                                                    |

|           |        |        |      |          |          |           |                            |
|-----------|--------|--------|------|----------|----------|-----------|----------------------------|
| Graniga   | 8.199  | 46.131 | 1100 | Jan 1995 | Dec 1996 | 5.3/33.3  |                            |
| Presolana | 10.099 | 45.929 | 1290 | Feb 1992 | Dec 1996 | 12.3/31.9 |                            |
| Aosta     | 7.355  | 45.742 | 563  | Jan 2003 | Dec 2004 | 4.8/0.0   | Longinelli and Selmo, 2006 |
| Introd    | 7.183  | 45.695 | 880  | Jan 2003 | Dec 2004 | 4.4/0.0   |                            |

<sup>1</sup>full means 1973–2010; \* stations belong also to the GNIP global network

Schürch, M., Kozel, R., Schotterer, U., Tripet, J.P., 2003. Observation of isotopes in the water cycle – the Swiss National Network (NISOT). *Environ. Geol.* 45, 1–11.

IAEA, 2010. Global Network of Isotopes in Precipitation. The GNIP Database. [www.isohis.iaea.org](http://www.isohis.iaea.org).

Kralik, M., Papesch, W., Stichler, W., 2003. Austrian Network of Isotopes in Precipitation (ANIP): Quality assurance and climatological phenomenon in one of the oldest and densest networks in the world. *Isot. Hydrol. and Integr. Water Resour. Manag. C&S Paper series.* 23, 146–149.

Longinelli, A., Selmo E., 2003. Isotopic composition of precipitation in Italy: a first overall map. *J. Hydrol.* 270, 75–88.

Longinelli, A., Selmo E., 2006. Isotopic composition of precipitation in Northern Italy: Reverse effects of anomalous climatic events. *J. Hydrol.* 329, 471–476.

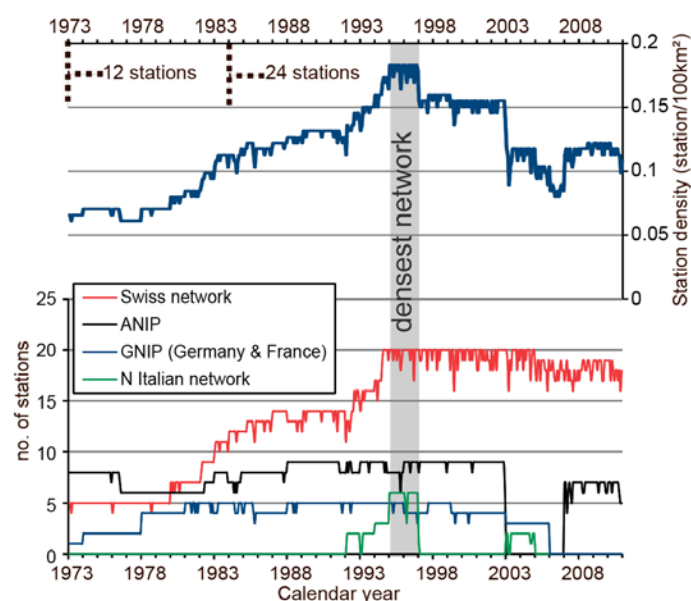

FigS1: Station density and temporal coverage of the merged networks between 1973 and 2010. Before 1973 practically only Thonon-les-Bains (France) and Bern (Switzerland) provided values to the record. (Data sources: NISOT (Schürch et al., 2003), ANIP (Kralik et al 2003), GNIP (IAEA, 2010), N-Italy (Longinelli and Selmo, 2003, 2006) and the private network run by the Division of Climate and Environmental Physics, Physics Institute, University of Bern)

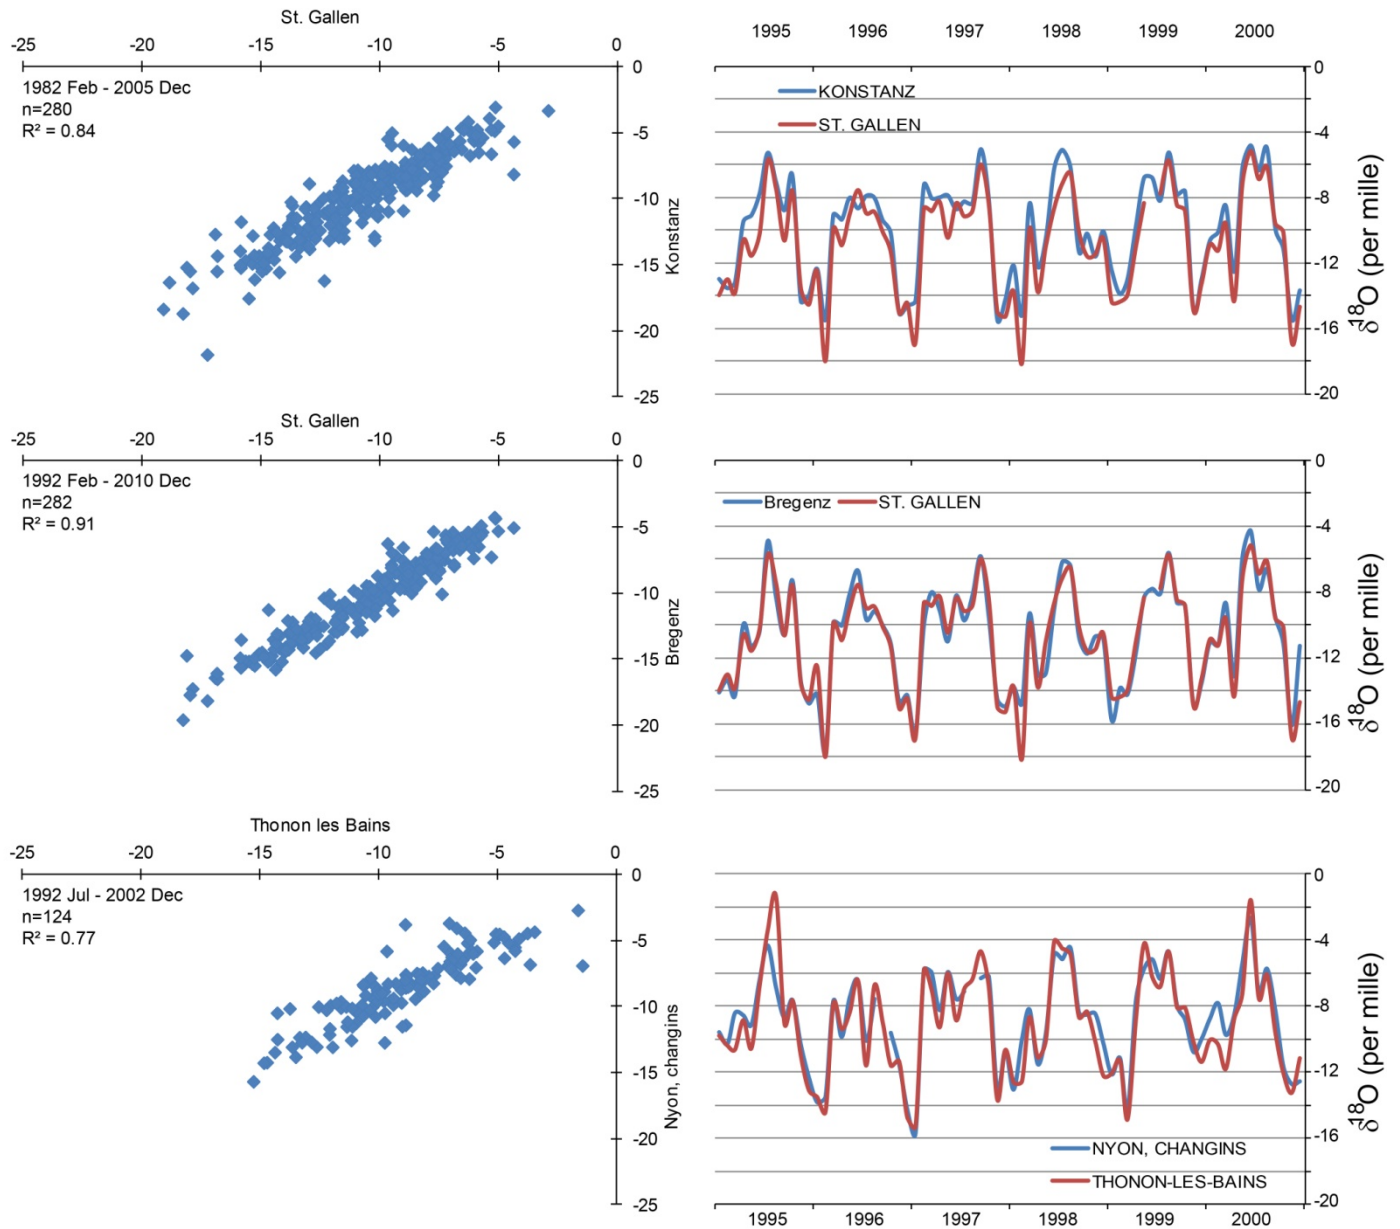

Fig. S2. Data consistency graph between nearby stations of different measuring networks. Three station comparisons are shown between the German (IAEA) and Swiss (KUP) networks (Konstanz – St. Gallen), Austrian (ANIP) and Swiss (KUP) networks (Bregenz – St. Gallen) and the French (IAEA) and Swiss (ISOT) networks (Thonon-les-Bains – Nyon Changins). The left cross plot show the correlation for the full overlapping period. The beginning and end month of overlap, the number of available pairs, and the  $R^2$  are indicated at the upper left corner of each panel. The right plot demonstrates the similarity between the station records over the 1995-2000 period, studied in the paper.

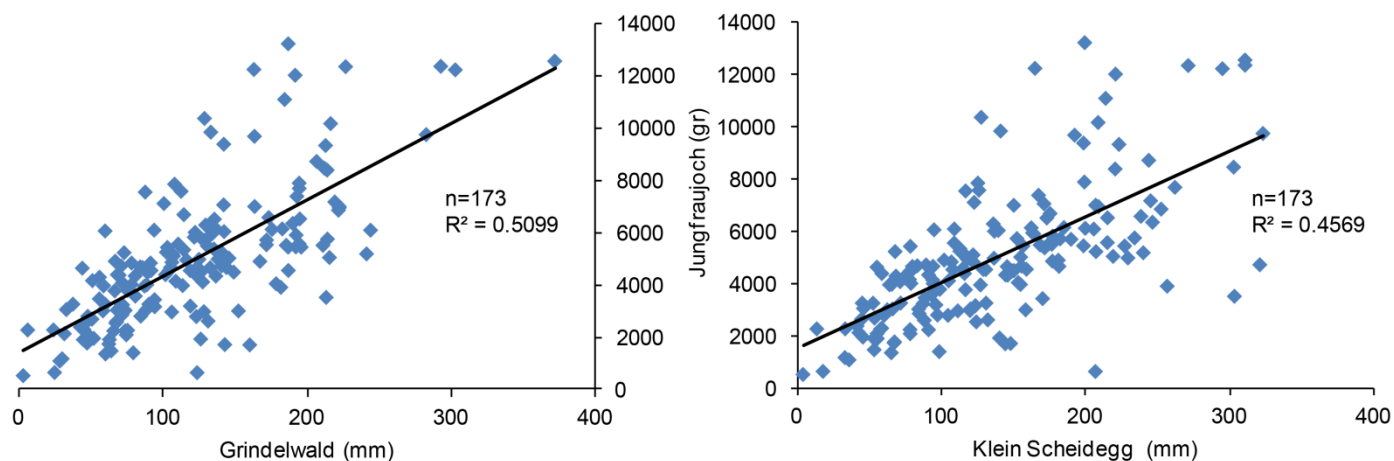

Fig. S3. Scatter plots of Grindelwald and Kleine Scheidegg gauge records against the available accumulated snow used for isotope analysis from Jungfraujoch between 1994 and 2010. As an official gauge is not operated at Jungfraujoch (JFJ) monthly amounts have been estimated for JFJ based on a bilinear regression using the best correlated nearby gauge records (Grindelwald and Kleine Scheidegg) as predictors.

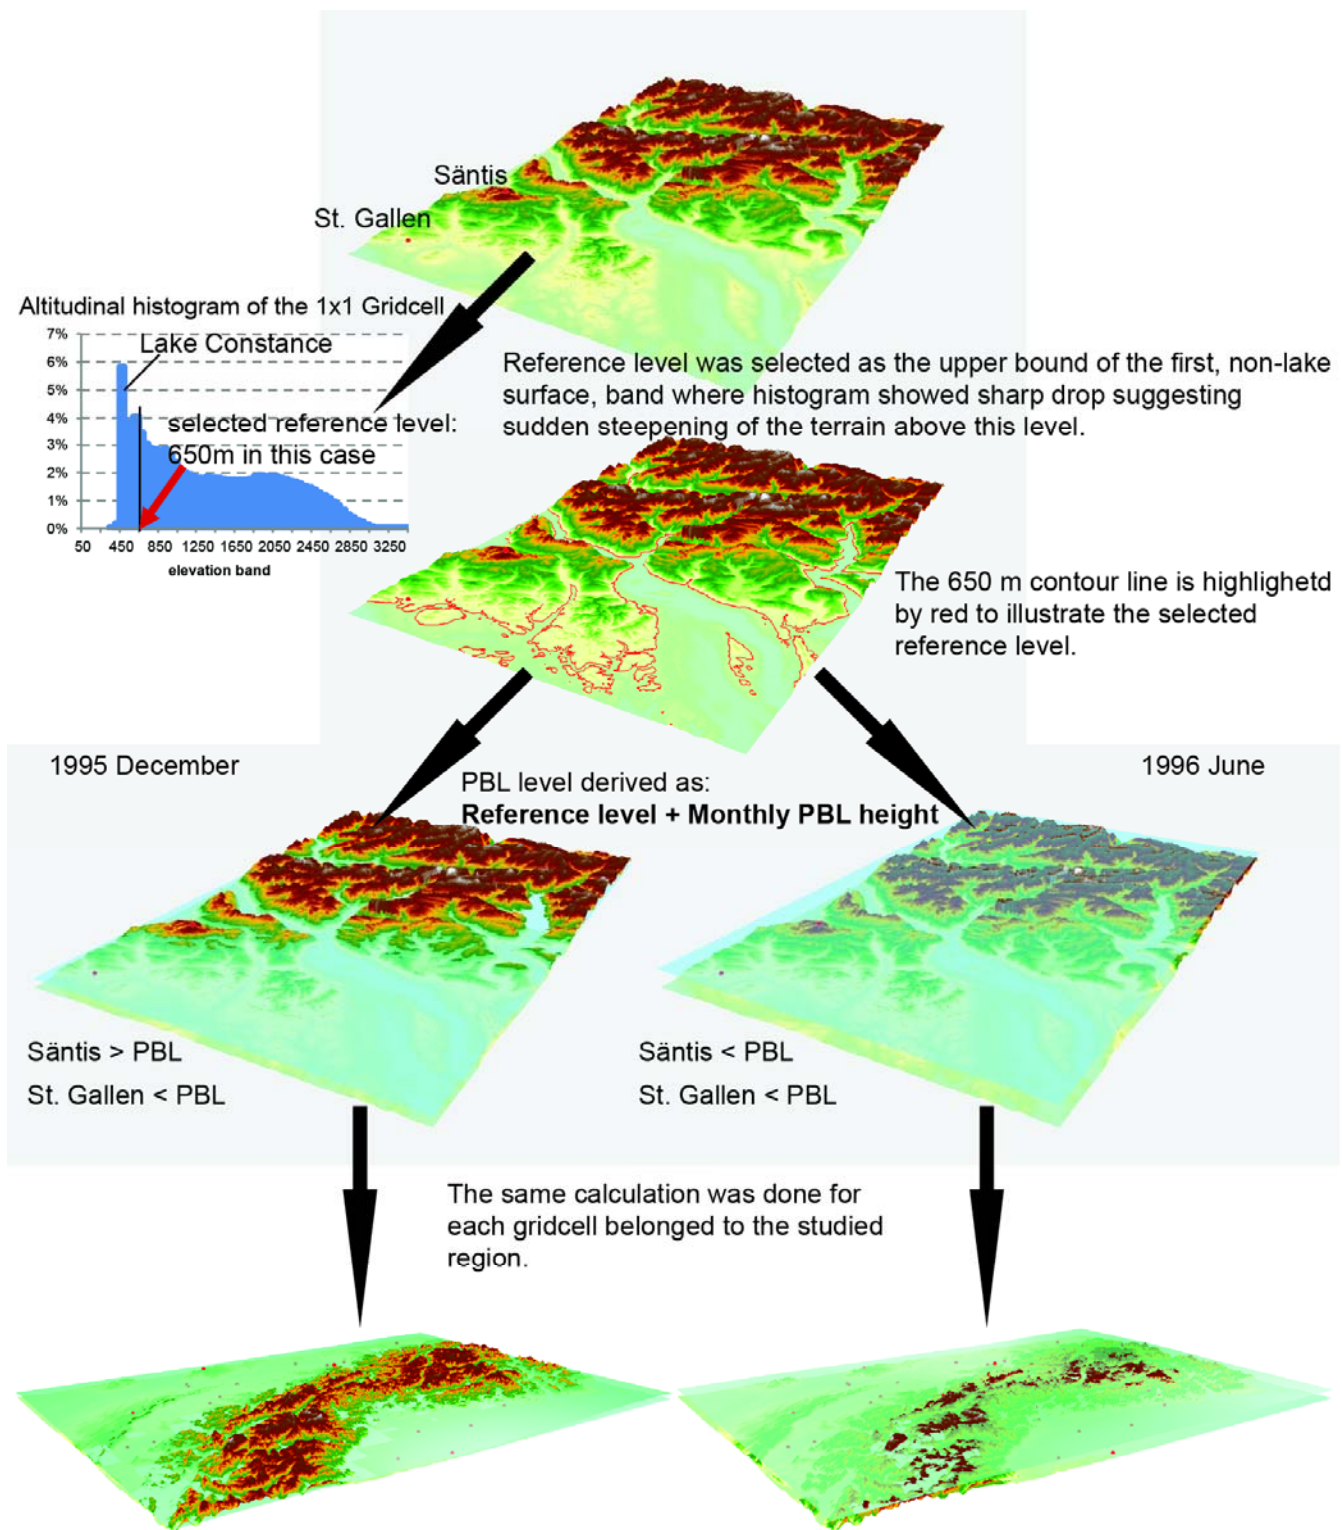

The same calculation was done for each studied month.

Fig. S4. Graphical illustration of the PBL derivation. For illustration purpose a winter (1995 Dec) and a summer (1996 June) month is selected.



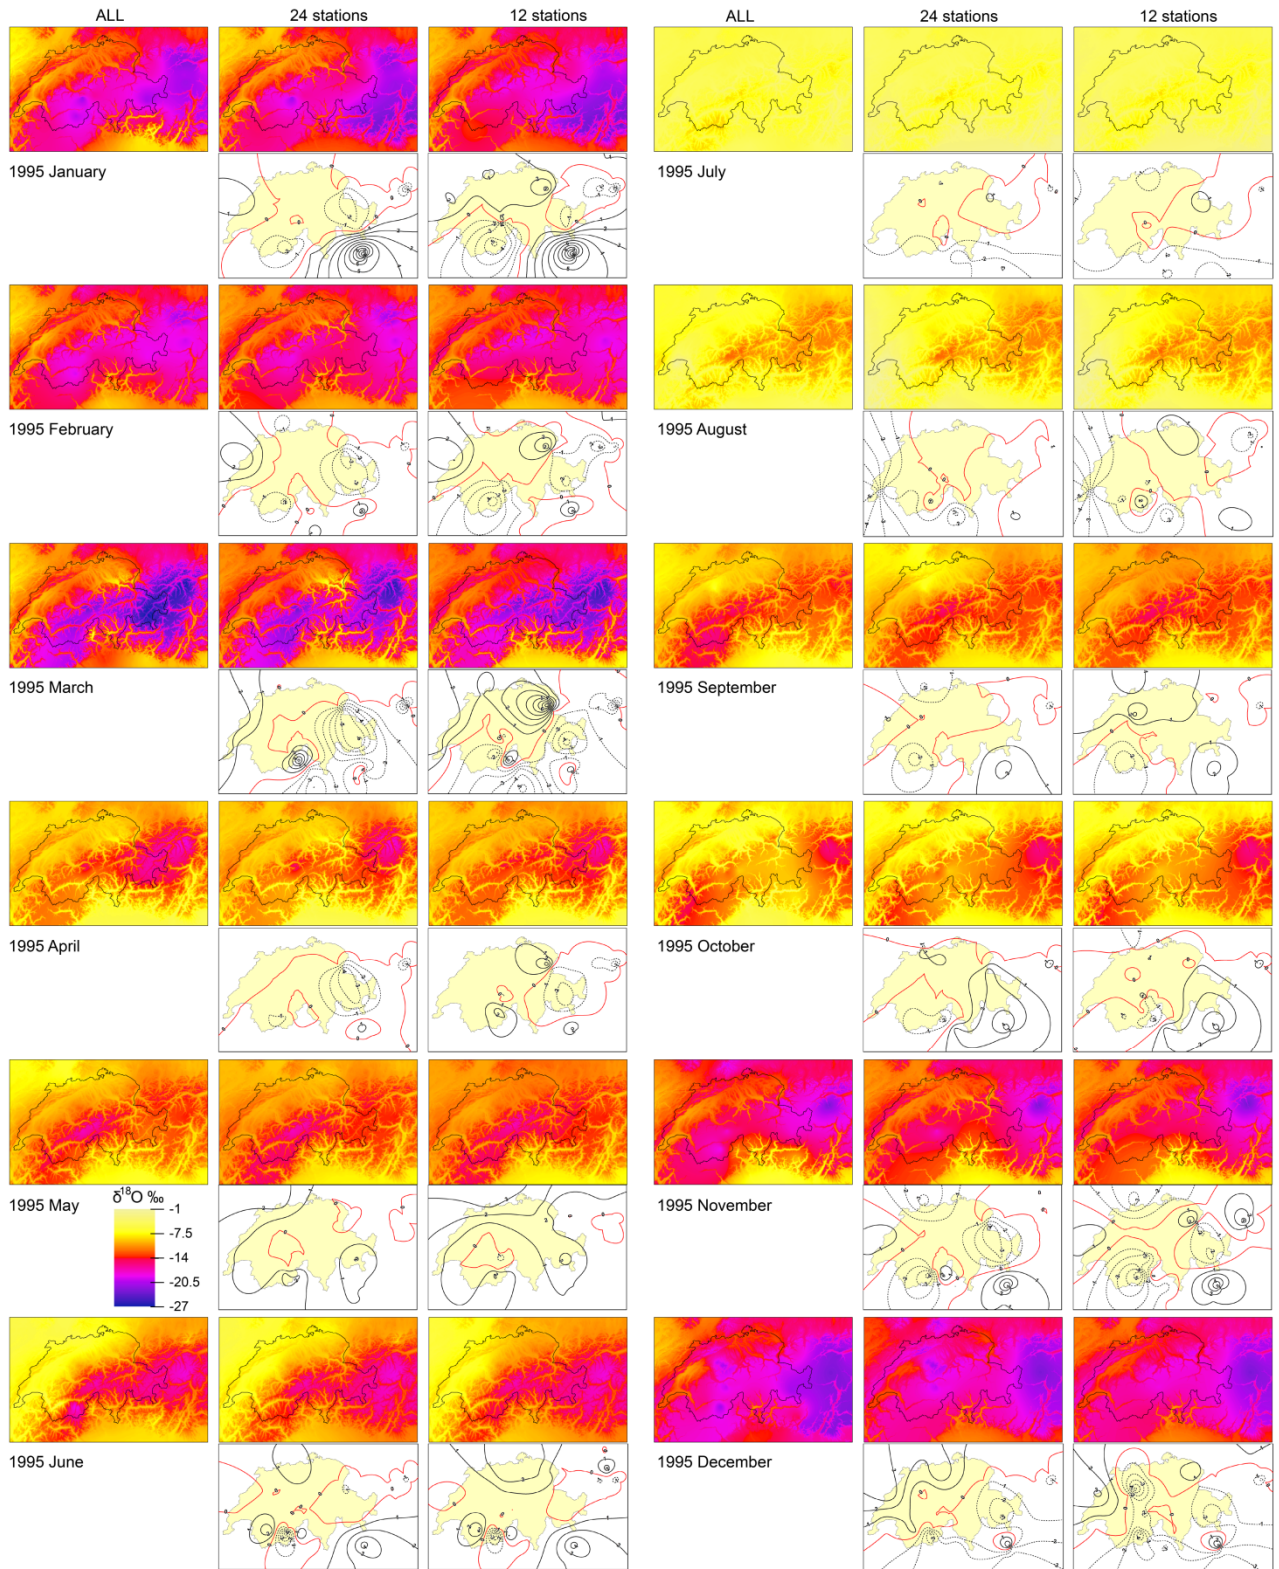

Fig. S5. Precipitation oxygen isoscapes for Switzerland derived for 1995. Left map shows the isoscape obtained using all available stations for each monthly set of maps. The longest 24 and 12 station records have been used for the middle and right maps, respectively. The difference maps, obtained after the grid computed with the reduced datasets was subtracted from the full one, are shown below the corresponding subset derived maps. Isolines for positive values are shown by bold lines; while for negative values are shown by dashed lines. The zero isoline is red.

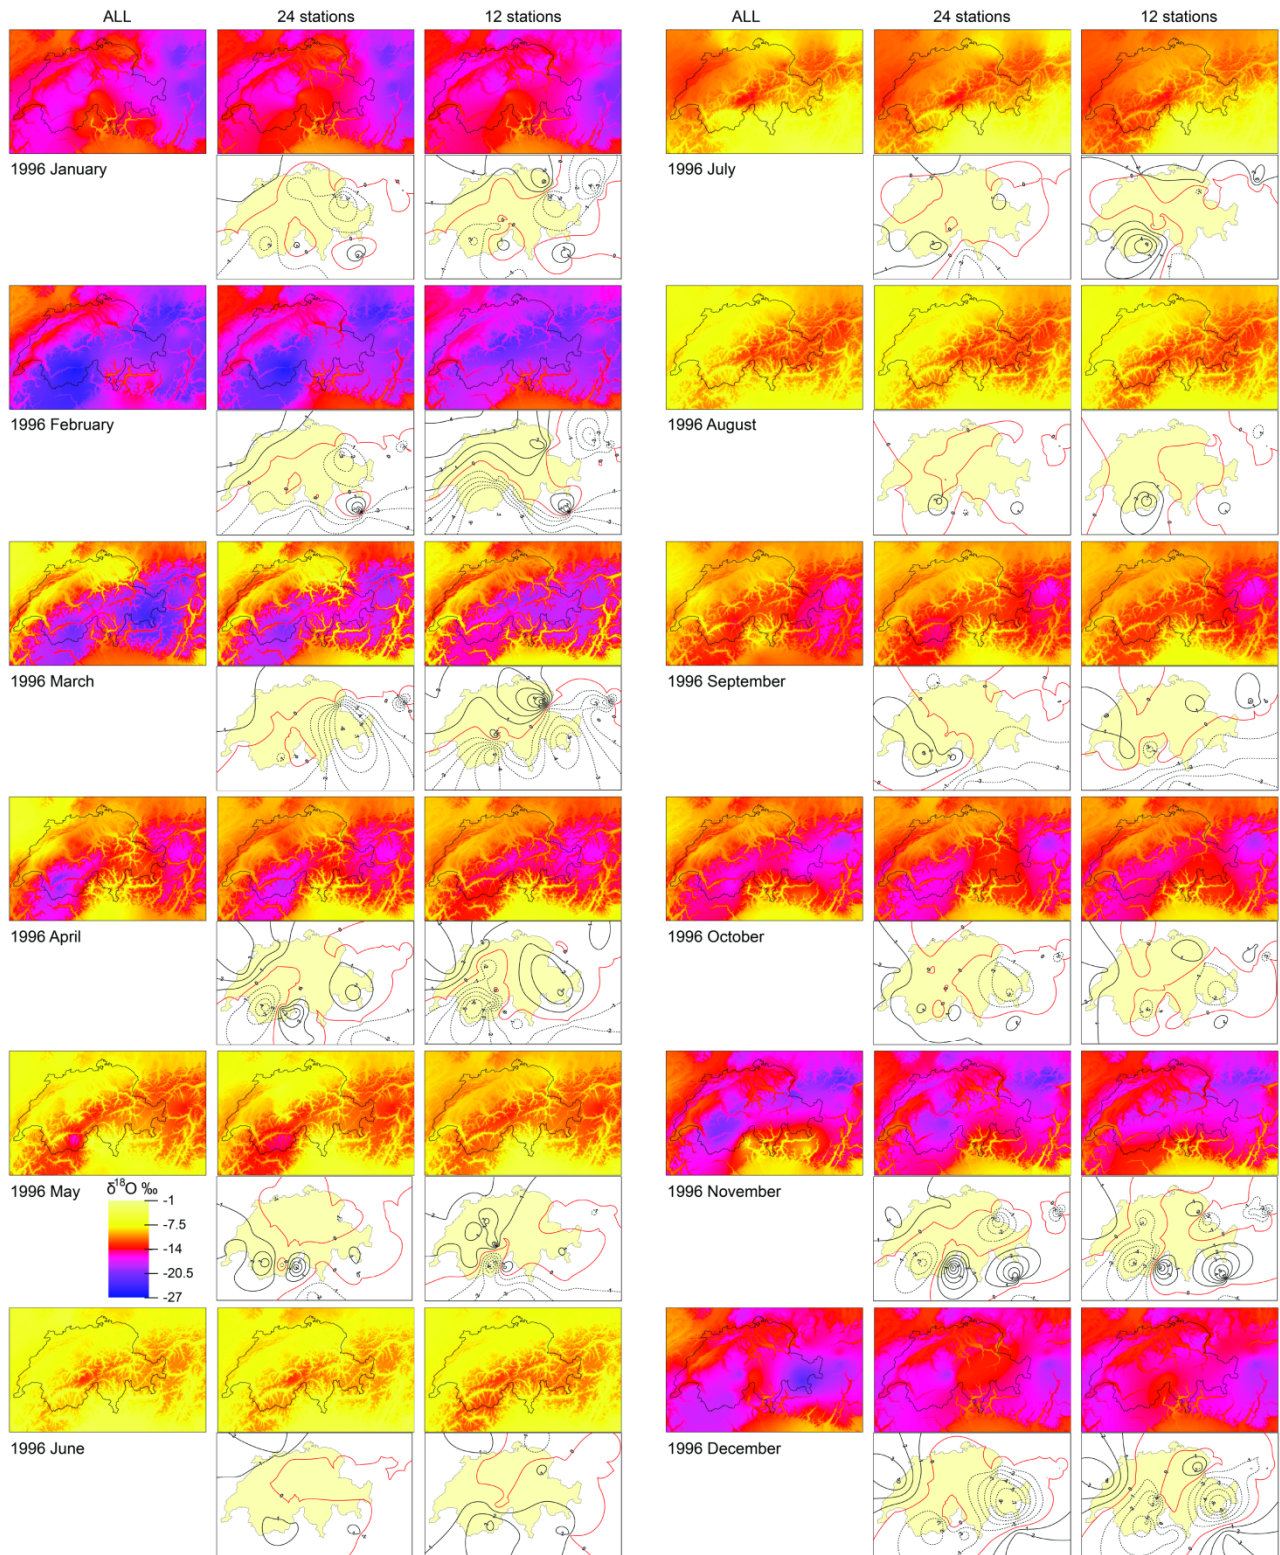

Fig. S6. Precipitation oxygen isoscapes for Switzerland derived for 1996. Left map shows the isoscape obtained using all available stations for each monthly set of maps. The longest 24 and 12 station records have been used for the middle and right maps, respectively. The difference maps, obtained after the grid computed with the reduced datasets was subtracted from the full one, are shown below the corresponding subset derived maps. Isolines for positive values are shown by bold lines; while for negative values are shown by dashed lines. The zero isoline is red.
